# Supplementary material for: Probiotics for Preventing Necrotizing Enterocolitis: A Meta‐Analysis with Trial Sequential Analysis
Source: Hindawi journal article supplement (doi:10.1155/2023/8626191), 2023-01-01
Supplement: f1 [file 8626191.f1.zip]

Archive with 3 entries (3 files):
- Appendix 2 Risk of bias summary.pdf
- PRISMA_2020_checklist-Probiotics for NEC.docx
- Supplemtary material (1).docx
