# Supplementary material for: Probiotics for Preventing Necrotizing Enterocolitis: A Meta‐Analysis with Trial Sequential Analysis
Source: Hindawi journal article supplement (doi:10.1155/2023/8626191), 2023-01-01

**Supplemtary material**

**Appendix 1 Search strategy (Embase )**

| 1 | exp Probiotic Agent/ or probiotic.mp. |
| --- | --- |
| 2 | probiotic$.ti,ab,kw. |
| 3 | exp bifidobacterium/ |
| 4 | bifidobacterium$.ti,ab,kw. |
| 5 | exp lactobacillus/ |
| 6 | lactobacill$.ti,ab,kw. |
| 7 | exp Saccharomyces/ or Saccharomyces boulardii/ or Saccharomyces cerevisiae/ |
| 8 | Saccharomyces$.ti,ab,kw. |
| 9 | 1 or 2 or 3 or 4 or 5 or 6 or 7 or 8 |
| 10 | exp Newborn/ or Newborn.mp. |
| 11 | exp Prematurity/ or Prematurity.mp. |
| 12 | (neonat$ or neo nat$).ti,ab. |
| 13 | (newborn$ or new born$ or newly born$).ti,ab. |
| 14 | (preterm or preterms or pre term or pre terms).ti,ab. |
| 15 | (prematur$ adj3 (birth$ or born or deliver$)).ti,ab. |
| 16 | (low adj3 (birthweight$ or birth weight$)).ti,ab. |
| 17 | infan$.ti,ab. |
| 18 | 10 or 11 or 12 or 13 or 14 or 15 or 16 or 17 |
| 19 | exp Randomized controlled trial/ or Randomized controlled trial.mp |
| 20 | Controlled clinical study/ |
| 21 | 19 or 20 |
| 22 | 9 and 18 and 21 |

**Appendix 2 Risk of bias summary**


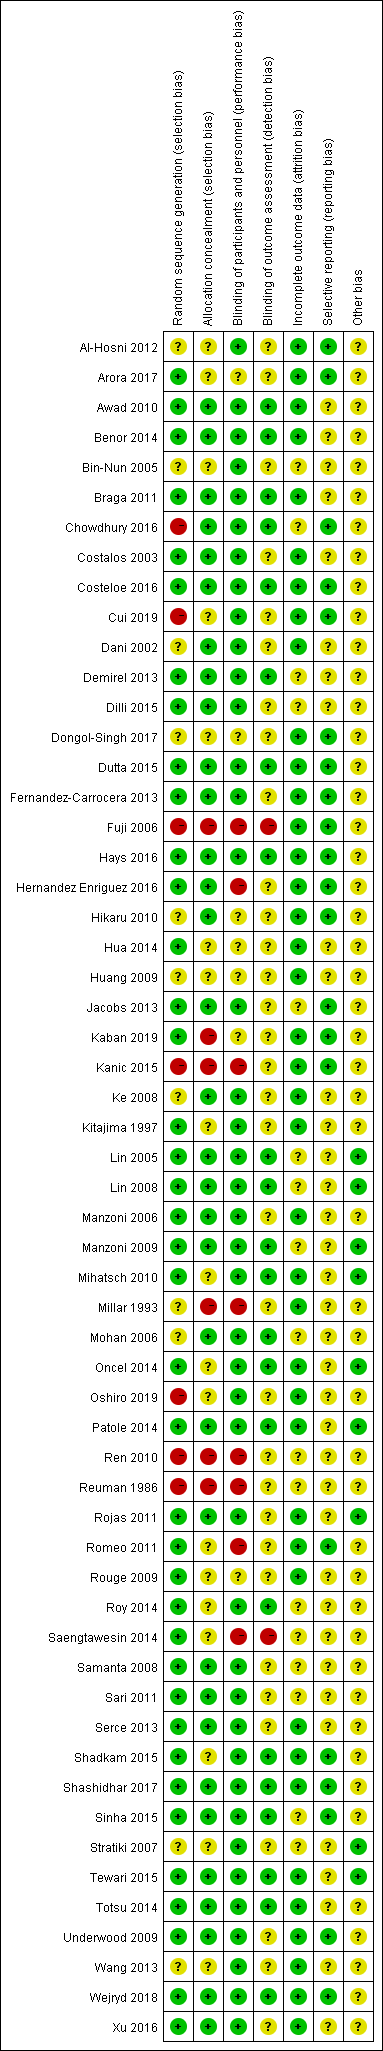

Supplement: f1 [file 8626191.f1.zip › Supplemtary material (1).docx]
